# Supplementary material for: Enhancement of circularly polarized electroluminescence via reflection reversal under a magnetic field
Source: Royal Society of Chemistry journal article supplement (doi:10.1039/d4tc00048j), 2024-01-01
Supplement: d4tc00048j1.pdf [file d4tc00048j1.pdf]

## Electronic supplementary information

### Enhancement of circularly polarized electroluminescence via reflection reversal under a magnetic field

Seika Suzuki,<sup>a</sup> Yuta Yamamoto,<sup>a</sup> Maho Kitahara,<sup>a</sup> Ryuta Shikura,<sup>b</sup> Shigeyuki Yagi,<sup>b</sup> Yoshitane Imai <sup>\*a</sup>

<sup>a</sup>Graduate School of Science and Engineering, Kindai University, 3-4-1 Kowakae, Higashi-Osaka, Osaka 577-8502, Japan.

<sup>b</sup>Department of Applied Chemistry, Graduate School of Engineering, Osaka Metropolitan University, 1-1 Gakuen-cho, Naka-ku, Sakai, Osaka 599-8531, Japan.

Email: y-imai@apch.kindai.ac.jp

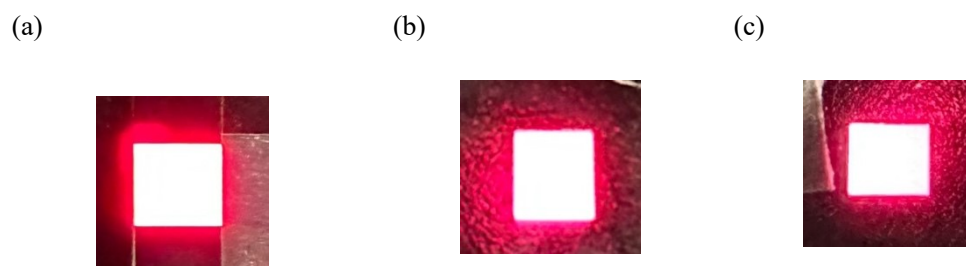

**Figure S1.** Photographs of electroluminescence (EL) from (a) Al/ITO-Device I, (b) MgAg/ITO-Device II, and (c) ITO/MgAg-Device II at 13 V.

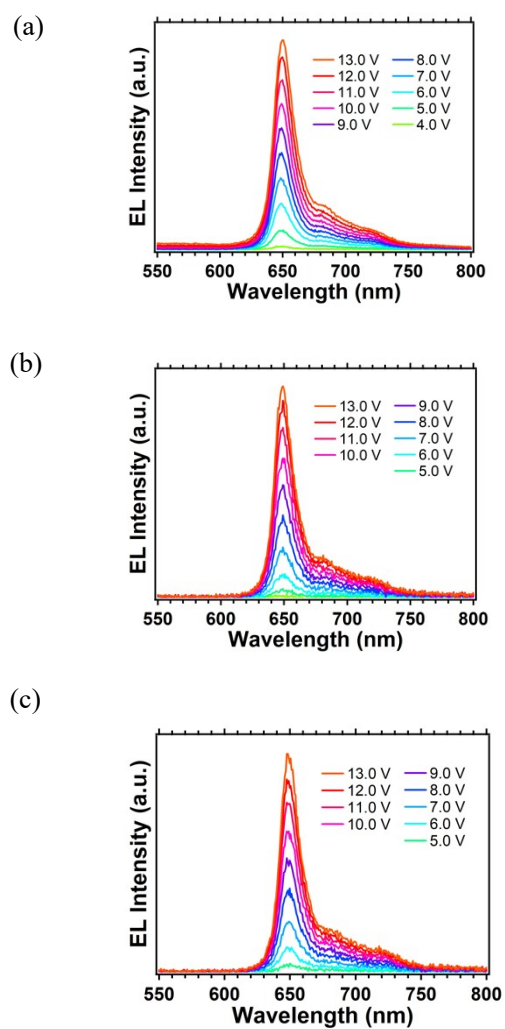

**Figure S2.** EL spectra of (a) Al/ITO-Device I, (b) MgAg/ITO-Device II, and (c) ITO/MgAg-Device II at various voltages.

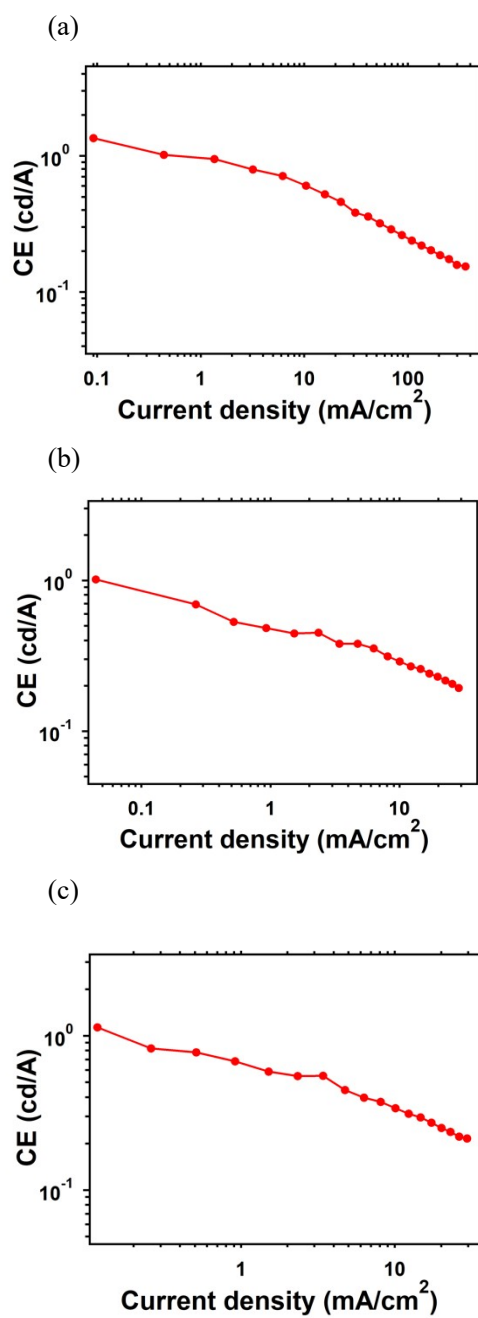

**Figure S3.** Current efficiencies (CE) as a function of current density for (a) Al/ITO-Device I, (b) MgAg/ITO-Device II, and (c) ITO/MgAg-Device II at 13 V.

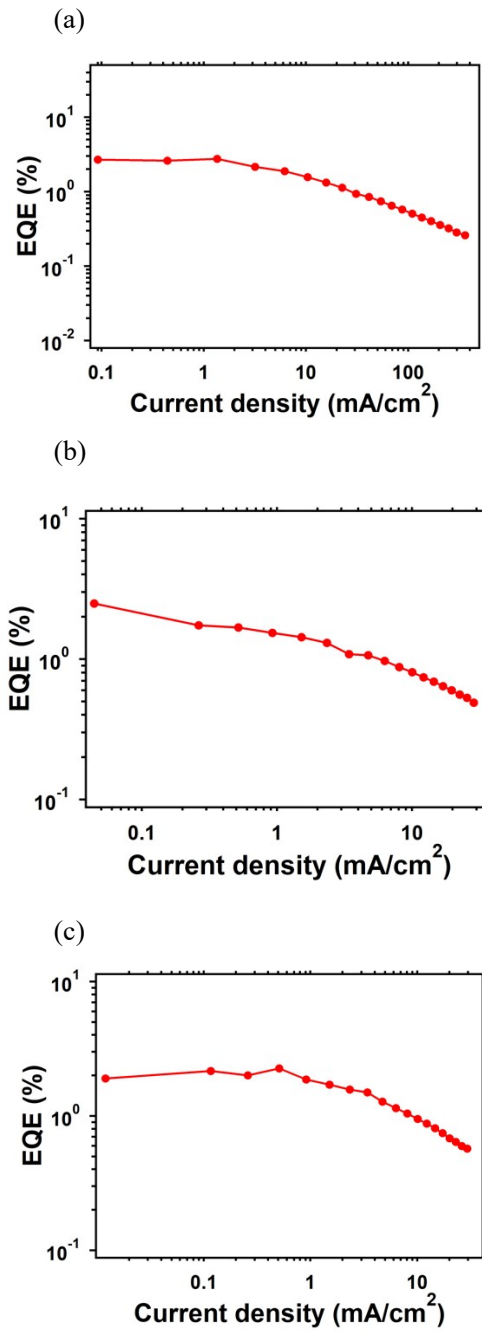

**Figure S4.** External quantum efficiencies (EQE) as a function of current density for (a) Al/ITO-Device I, (b) MgAg/ITO-Device II, and (c) ITO/MgAg-Device II at 13 V.
